# Supplementary material
Source: MDPI journal article supplement (https://www.mdpi.com/2073-4441/11/10/2120)
Supplement: s1 [file s1]

## Sheet: Table S1
Table S1. Isotopic compositions in water and carbon-13 in DIC and 14C-age of water samples under the study
No.	Well ID	Depth, m	Aquifer	Rainy season (Aug-11)		Dry season (Mar-12)		3H, TU	d13CTDIC, ‰	14CTDIC,	14C-age, a BP
		bgs*		δ18O, ‰*	δ2H, ‰*	δ18O, ‰	δ2H, ‰		vs. VPDB	pMC
1	GV-01	70	t	-8.4	-58.03	-7.96	-58.31	2.03±0.34	-16.58	85.30±0.87	modern
2	NM1**			-8.23	-55.91	-7.92	-53.52	3.14±0.42
3	NM2			-7.58	-52.26	-8.12	-53.14	2.97±0.37
4	OB-01	7.6	qh	-3.72	-30.11	-4.53	-29.35	2.73±0.32	ND	ND
5	OB-02	8.5	qh	-3.46	-26.03	-4.48	-28.75	2.06±0.37	ND	ND
6	OB-04	8.3	qh	-2.69	-20.99	-3.39	-21.58	2.63±0.36	ND	ND
7	OB-06	6.7	qh	-6.26	-43.12	-6.76	-44.24	3.10±0.33	ND	ND
8	OB-07	7.3	qh	-4.54	-34.25	-5.85	-38.87	2.60±0.33	ND	ND
9	OB-08	8.1	qh	-5.68	-40.95	-6.07	-41.93	1.89±0.46	-17.27	ND
10	OB-09	6.1	qh	-8.25	-55.13	-4.61	-31.5	2.55±0.37	ND	ND
11	OB-10	8	qh	-4.82	-35.23	-5.19	-35.52	2.83±0.26	-17.25	101.2	modern
12	OB-11	7.8	qh	-3.77	-30.34	-3.98	-29.41	2.31±0.41	ND	ND
13	OB-12	7.6	qh	-5.9	-40.97	-6.03	-41.54	2.03±0.36	-17.32	103.5	modern
14	OB-13	6.7	qh	-2.38	-19.72	-3.25	-21.9	1.93±0.43	ND	ND
15	OB-14	8.4	qh	-3.58	-25	-4.06	-27.47	2.02±0.37	ND	ND
16	OB-15	8.8	qh	-4.24	-33.3	-5.06	-34.5	2.04±0.32	ND	ND
17	OB-16	9.6	qh	-3.9	-29.91	-3.88	-29.04	2.52±0.33	ND	ND
18	ND02-1	15	qh	-6.89	-49.3	-7.21	-48.34	2.31±0.38	-16.81	98.7	modern
19	Q221a	70	qp	-7.97	-61.18	-7.46	-59.36	<LOQ	-14.11	41.6±1.7	5900 ± 250
20	Q222b	115	qp	-6.24	-42.17	-6.63	-42.74	<LOQ	-13.02	28.3±2.5	9100 ± 800
21	Q224a	100	qp	-7.68	-55.43	-7.34	-53.62	<LOQ	-13.06	27.0±2.2	9500 ± 750
22	Q225a	110	qp	-7.08	-50.14	-7.31	-49.99	<LOQ	-11.3866	23.3±3.2	9700 ± 1300
23	Q226a	105	qp	-7.63	-51.69	-6.95	-43.9	<LOQ	-11.3945	21.8±2.2	10200 ± 1000
24	Q227a	155.5	qp	-7.25	-43.97	-7.73	-51.69	<LOQ	-11.527	15.8±2.6	12900 ± 2000
25	Q228a	120	qp	-8.96	-75.26	-7.83	-65.68	<LOQ	-11.4959	18.9±3.5	11400 ± 2100
26	Q229a	85	qp	-6.13	-41.6	-6.32	-40.53	<LOQ	-11.3394	52.8±1.6	2900 ± 87
27	Q110a	93.6	qp	-6.83	-46.37	-6.58	-47.26	<LOQ	-11.43	36.2±1.8	6000 ± 300
28	Q109a	135.8	qp	-7.43	-51.32	-7.16	-50.16	<LOQ	-11.57	19.2±2.7	11300 ± 1600
29	Q108b	80	qp	-6.44	-46.82	-6.93	-47.21	<LOQ	-11.43	51.1±1.4	3300 ± 90
30	Q92	43	qp	-6.53	-48.26	-5.78	-38.51	<LOQ	-12.87	74.6±2.1	1100 ± 50
31	Q229n	150	n	-7.75	-57.81	-7.07	-53.41	<LOQ	-11.96	16.7±2.1	12400 ± 1600
32	Q109	170.6	n	-6.84	-47.47	-6.73	-46.25	<LOQ	-11.59	30.8±2.0	7400 ± 500
33	Q226n	151.5	n	-7.19	-46.29	-7.65	-52.35	<LOQ	-13.15	16.6±2.6	13500 ± 2100
34	Q221n	127	n	-7.7	-59.23	-7.63	-59.04	<LOQ	-12.93	21.6±2.2	11300 ± 1150
35	Q223n	138	n	-8.65	-68.56	-8.57	-60.52	<LOQ	-13.1	14.7±2.6	14500 ± 2500
36	Q220t	100	t	-6.92	-43.25	-6.67	-42.17	<LOQ	-11.94	47.8±1.7	3700 ± 130
37	Q92a	100	t	-7.32	-44.04	-7.15	-42.28	<LOQ	-8.92	54.1±2.5	850 ± 40
*bgs: below ground surface; d18O and d2H are relative to the VSMOW; **NM: surface water (water from Dao and Ninh Co irrigation canals)
qh: Holocene aquifer; qp: Pleistocene aquifer; n: Neogene aquifer; t: Triassic aquifer
ND: not determined; LOQ: Limit of quantification. For the 3H measurement it is 0.4 TU

## Sheet: Table S2
Table S2. Chemistry of water samples under the study
No.	Well ID	Depth,m	Aquifer	EC, mS cm-1		T, oC		pH	Fe2+, mg L-1		Na+, mg L-1		K+, mg L-1		Ca2+, mg L-1		Mg2+, mg L-1		NH4+, mg L-1		Cl-, mg L-1		Br, mg L-1		NO3-, mg L-1		SO42-, mg L-1		HCO3-, mg L-1
		bgs*		2011-08-01	2012-03-01	2011-08-01	2012-03-01	2012-03-01	2011-08-01	2012-03-01	2011-08-01	2012-03-01	2011-08-01	2012-03-01	2011-08-01	2012-03-01	2011-08-01	2012-03-01	2011-08-01	2012-03-01	2011-08-01	2012-03-01	2011-08-01	2012-03-01	2011-08-01	2012-03-01	2011-08-01	2012-03-01	2011-08-01	2012-03-01
1	OB-01	7.6	qh	22460	22500	26.5	25.2	7.46	17.3041	18.753	4103.5	3737.5	125.95	55.599	48.027	55.599	304.6	305.45	86.3111	86.0419	7025.73	7090.6	33	25.3	10.889	2.5208	26.144	0.9089	70.3474	77.8
2	OB-02	8.5	qh	33820	31960	26.7	25.7	7.39	47.4417	38.4741	5007	5165.5	133.3	234.244	260.814	234.244	463.55	468.65	90.2222	87.0765	9963.77	10281.4	53.7	32.5	12.463	0	12.574	0.9391	401.199	42.7
4	OB-04	8.3	qh	37000	36260	26	24.7	8.04	5.2903	5.25299	5961.5	5768.5	268.65	50.58	46.575	50.58	509.25	496	57.2444	58.1947	12377.3	11699.5	56.3	37.4	9.842	4.0213	11.856	0.8616	560.9	58.6
5	OB-06	6.7	qh	10990	9430	26	25	7.88	0.63519	1.94761	1397.5	1680	86.46	33.031	24.165	33.031	143.25	148.95	29.2444	34.3133	2658.98	2481.71	12.7	10.2	10.902	0.7594	9.274	1.0674	85.8297	93
6	OB-07	7.3	qh	1691	1513	26.9	25.4	7.44	22.789	12.7769	197.96	147.4	25.71	70.323	68.946	70.323	55.66	59.86	9.24444	10.1733	212.718	120.528	0.7	0.7	0.08715	0	40.9336	12.7005	75.7051	84.5
7	OB-08	8.1	qh	2716	2601	25.9	25.2	7.24	17.5577	15.502	371.1	354.1	22.88	50.381	46.771	50.381	64.35	66.19	30.9333	28.0197	541.158	531.795	2.5	2.2	11.04	0.42285	11.01	0.5907	66.6546	84.2
8	OB-09	6.1	qh	182	193	28.6	26.1	7.34	3.25557	3.37052	2.9854	3.496	1.27	27.78	19.848	27.78	4.736	5.559	0.142222	0.284507	2.95529	3.64586	0	0	0.11377	0.07334	7.89297	9.70541	33.2926	24.3
9	OB-10	8	qh	21580	21020	26.2	25.8	7.62	11.9548	11.5578	3508.5	3049.5	190.4	75.176	63.687	75.176	404.1	392.85	45.4222	44.3142	6402.45	4786.15	32.9	18.6	9.925	0	9.199	1.1883	136.889	152.5
10	OB-11	7.8	qh	12600	11400	26.5	25.5	7.79	0.745478	1.74382	2038	1726	112.6	42.205	57.093	42.205	192.35	199.25	34.4	37.2446	3190.77	3722.57	15.2	13.7	10.164	0.7399	21.117	1.0604	119.554	143.4
11	OB-12	7.6	qh	4465	4328	27.1	25.8	7.48	12.9869	13.1713	688.1	653.6	46.18	79.763	71.968	79.763	95.92	100.46	18.5778	18.1912	1169.95	1063.59	4.6	4.2	13.346	0.36135	13.649	0.5639	77.4133	81.7
12	OB-13	6.7	qh	42660	38660	26.2	25.4	7.64	8.00328	8.65936	3156	5678.5	280.5	130.417	120.752	130.417	764.4	690	56.1778	44.7452	12408.5	9217.78	57.6	37.6	9.498	0	17.167	4.1259	164.345	200
13	OB-14	8.4	qh	23540	21680	29.3	24.3	7.53	2.73362	5.16633	3075.5	3376.5	205.1	53.173	45.751	53.173	347.1	344.1	49.3333	44.0555	6647.44	6204.28	32.9	22.3	10.408	0	12.09	1.492	119.554	140.3
14	OB-15	8.8	qh	6786	6936	28	28.7	7.02	33.6586	29.3665	997.5	897.4	37.18	115.792	120.988	115.792	93.51	98.12	16.2667	87.4213	1957.46	1949.91	10.6	10.6	13.456	0	15.692	0.50075	65.4877	75.6
15	OB-16	9.6	qh	1827	1838	27	25	7.51	2.71887	2.50697	211.7	209.5	46.07	47.855	37.431	47.855	79.26	80.56	10.8444	11.0354	305.363	283.624	0.9	0.8	72.959	0.3844	18.05	0.53885	67.8748	77.2
16	Q221a	70	qp	2940	2836	27.4	26.9	6.93	15.1	6.9	458.86	293.6	12.45	9.9	95.26	102.7	75.81	70.4	49.24	34.6	780	765.2			0.16	0.2	1.57	0.6	564.3	557.9
17	Q222b	115	qp	6980	6297	28.4	26.8	6.67	33.4	24.7	1003.3	1146.3	16.1	13.7	113.15	106.3	106.3	125.5	42.77	45.6	2216	2247	62.1	47.3	0.29	0.4	1.26	0.7	128.1	137.7
18	Q224a	100	qp	3084	2940	29	28.6	6.9	21.7864	20.0438	306.1	302.9	10.45	144.343	136.961	144.343	65.64	63.02	15.8222	14.8289	904.051	850.872	3.8	4.5	15.138	0.51545	11.739	0.5125	26.7074	271.45
19	Q225a	110	qp	6168	6080	28.7	27.9	7.3	2.10963	2.06414	909	969.4	38.74	96.448	91.474	96.448	109.62	105.58	28.9778	26.7264	1896.74	1772.65	8.9	6.8	11.98	0.64995	18.756	0.66385	497.113	542.9
20	Q226a	105	qp	3786	3680	29.2	ND	7.26	6.52883	7.82271	554	578.3	17.09	74.678	69.535	74.678	51.89	52.81	24.5333	23.7089	1063.59	992.684	4.9	6.2	10.966	0.51015	12.03	0.44825	33.1314	469.7
21	Q227a	105.5	qp	482	397	29.9	28.7	7.52	0.556	0.8	80.25	92.6	5.55	4.5	7.61	13.1	21.02	25.4	0.82	0.5	18	17.3	0.1	0.5	0.92	0.2	19.68	7.5	264.5	254.6
22	Q110a	93.6	qp	932	957	28.6	27.7	7.32	1.45	0.7	105.38	115.6	5.5	3.2	32.94	41.3	30.25	33.5	0.16	0.4	152	164	0.355	0.17	0.12	0.1	14.76	2.7	283.7	275.9
23	Q228a	120	qp	478	405	29.5	28.5	7.8	0.313	0.5	109.72	132.4	5.96	3.7	0.5	1.4	5.18	3.7	0.89	0.7	25	15.9			0.83	0.4	1.41	0.5	255.4	263.6
24	Q229a	85	qp	564	479	27.5	27.4	7.81	0.581	0.8	93.61	111.8	6.05	5.8	13.24	11.6	27.44	15.8	1.02	0.7	37	25.8		0.38	0.43	0.2	1.4	0.6	280.1	277.6
25	Q109a	135.8	qp	2360	2136	24.5	24.2	7.31	4.55	1.7	398.77	386.6	11.83	9.7	46.77	44.9	56.59	61.1	7.23	6.3	461	453	0.651	0.75	0.13	0.1	1.13	0.5	564.3	572.4
26	Q108b	80	qp	919	1005	28.7	27.6	6.96	6.12	2.5	87.79	93.2	29.54	20.6	14.13	12.7	31.74	27.3	3.11	1.4	191	215	0.61	1.3	0.16	0.2	1.67	1.1	161.7	172.5
27	Q92	43	qp	919	825	26.7	27.4	7.57	4.34	2.6	28.51	30.5	5.25	5.1	56.33	48.7	61.35	56.8	0.7	0.3	177	185	0.883	1.6	0.16	0.1	1.48	0.5	250.1	253.4
28	Q221n	127	n	5330	5428	28.2	27.4	7.02	3.12	1.5	839.78	795.8	24.59	15.4	96.07	112.2	112.85	106.2	10.84	7.4	1507	1572			0.13	0.1	37.72	12.4	411.8	403.6
29	Q223n	138	n	2900	2850	28.8	28.5	6.52	24.576	25.243	318.8	339.55	6.09	124.932	123.068	124.932	58.06	60.84	8.26667	8.01793	841.449	921.778		26.4	17.554	0.4785	14.975	0.498	163.488	183
30	Q226n	151.5	n	2568	2740	29.3	29.5	7.99	7.56094	5.91036	201.22	322.5	11.14	106.951	99.834	106.951	84.94	81.95	4.17778	5.60393	709.06	709.06	3.2	1.5	11.794	0.45395	9.472	0.8402	41.969	366
31	Q109	170.6	n	1531	1547	30.5	27.6	7.46	0.599	0.2	220.71	227.3	11.86	15.6	8.38	13.5	33.95	28.5	2.18	2.6	337	347			0.05	0.05	1.07	1.4	244	236.8
32	Q229n	150	n	488	439	29.1	28.7	7.41	0.861	0.2	68.44	74.7	5.87	5.5	6.08	4.7	12.59	14.6	1.02	0.3	25	24.8			0.7	0.2	1.28	0.6	253.7	266.8
33	GV01	70	t	315	289	28.7	28.4	7.7	0.4	0.3	3.459	4.8	0.57	0.2	84.758	92.6	16.482	13.6	0	0.1	7.38	6.8	0	0	8.571	1.4	9.207	4.6	305	332.9
34	Q220t	100	t	723	763	28	27.4	7.45	0.578	0.7	163.16	157.3	4.48	5.7	0.71	1.5	3.65	1.7	2.68	2.6	38.7	30.6			0.07	0.1	106.6	57.9	256.2	248.8
35	Q92a	100	t	1166	1032	27.2	26.5	8.12	1.18	0.4	92.25	87.9	4.1	4.7	45.23	51.3	57.15	55.5	0.66	0.2	319	276	0.843		0.02	0.1	1.11	0.2	79.3	83.2
36	NM1**			240	249	29.1	25.3	8.06	0.217	0.2	11	15.7	2.25	3.2	20.23	23.4	8.32	6.8	2.6	1.7	18	14.2		0.11	0.09	0.3	32.8	21.1	109.8	121.3
37	NM2			203	263	27.6	26.1	7.91	0.228	0.3	5	11.5	2.3	1.7	20.39	18.9	7.28	7.3	1.53	0.8	9	13.6		0.16	0.28	0.2	24.6	16.3	109.8	113.5
bgs*: below ground surface; NM**: surface water; Aug-11: rainy season in 2011; Mar-12: dry season in 2012
qh: Holocene aquifer, qp: Pleistocene aquifer; n: Neogene aquifer; t: Triassic aquifer
